# Supplementary material for: Comparative Root Transcriptomics Provide Insights into Drought Adaptation Strategies in Chickpea (Cicer arietinum L.)
Source: MDPI journal article supplement (doi:10.3390/ijms21051781), 2020-03-05
Supplement: s1 [file s1]

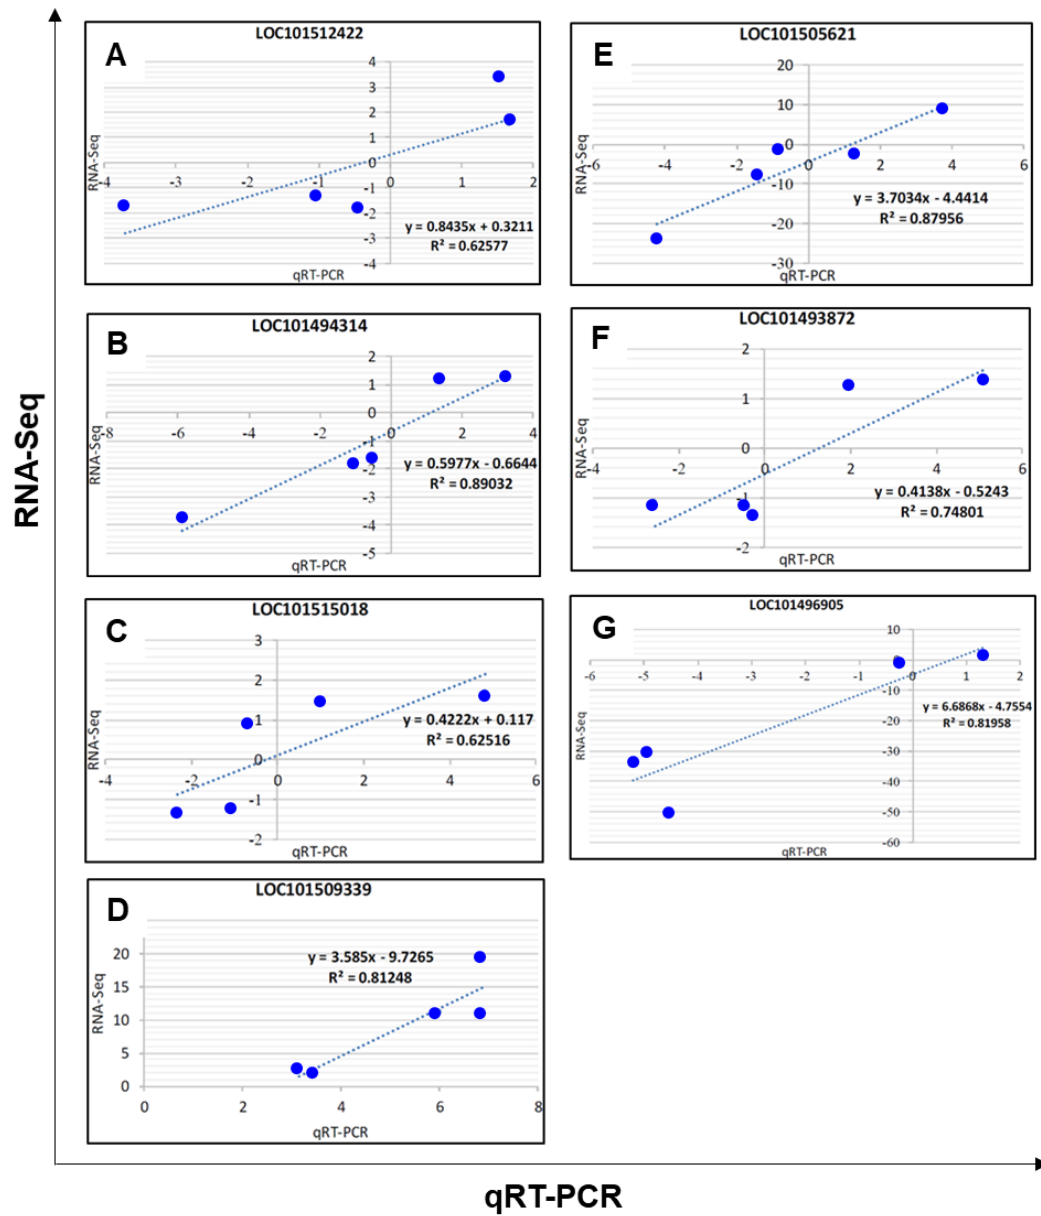

**Supplementary Figure S1:** qRT-PCR validation of DEGs during three developmental stages VS, RTS, RS. The correlation between fold change obtained by using qRT-PCR (x-axis) and RNA-Seq (y-axis).

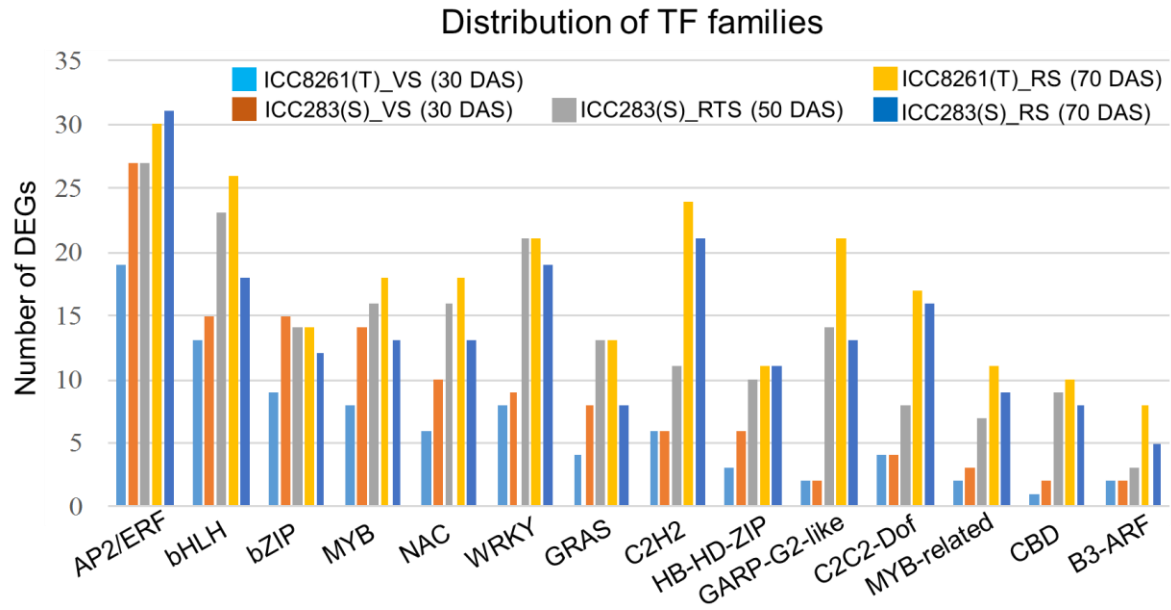

**Supplementary Figure S2:** Top TF families represented in DEGs across vegetative stage (VS), reproductive transition stage (RTS) and reproductive stage (RS) in tolerant (T, ICC8261) and sensitive (S, ICC283) genotypes.
